# Supplementary material
Source: Royal Society of Chemistry journal article supplement (doi:10.1039/d6nr00414h)
Supplement: d6nr00414h1.pdf [file d6nr00414h1.pdf]

## Electronic Supplementary Information

### Reagent

Urea ( $\geq 99.0\%$ , Sigma-Aldrich), melamine ( $\geq 99.0\%$ , Sigma-Aldrich), potassium iodide ( $\geq 99.5\%$ , Merck), potassium hydrogen phthalate ( $\geq 99.5\%$ , Sigma-Aldrich), sodium hydroxide ( $\geq 97.0\%$ , Merck), 5,5-dimethyl-1-pyrroline N-oxide, DMPO ( $\geq 99\%$ , Sigma-Aldrich), 2,2,6,6-tetramethylpiperidine-1-oxyl, TEMPO (99%, Sigma-Aldrich), 2,2,6,6-Tetramethylpiperidine, TEMP ( $\geq 99.0\%$ , Sigma-Aldrich), 1,4-benzoquinone ( $\geq 98.0\%$ , Sigma-Aldrich), silver nitrate ( $\geq 99.0\%$ , Merck), *tert*-butanol ( $\geq 99.0\%$ , Merck), anatase and rutile TiO<sub>2</sub> (99.5%, Sigma-Aldrich) were used as received. Ultrapure water procured from the Milli-Q<sup>®</sup> system was used throughout all the experiments.

### Synthesis

To synthesize the triazine sample, 4.5 g of urea and then 0.5 g of melamine were placed in a combustion boat partially covered with aluminum foil and calcined in a tube furnace at 550 °C for 2 h with a heating rate of 10 °C min<sup>-1</sup> under a mildly reducing atmosphere (5 vol% H<sub>2</sub> in N<sub>2</sub>, 20 mL min<sup>-1</sup>). After cooling to room temperature, the product was ground, washed with water until neutral pH was reached, and dried under vacuum at 80 °C for 12 h. For comparison, the heptazine sample was prepared using the same precursor composition but calcined in a crucible fully covered with aluminum foil at 550 °C for 2 h (10 °C min<sup>-1</sup>) in a muffle furnace under air. The resulting product was treated identically by grinding, washing to neutral pH, and vacuum drying at 80 °C for 12 h.

### Characterization

The microstructure was analyzed by XRD (Aeris Panalytical). Morphological characteristics were observed using SEM (Thermo Apreo 2) and TEM (Talos F200X). The specific surface area was determined using an adsorption analyzer (TriStar II 3020). O<sub>2</sub> adsorption on the photocatalysts was measured by TPD using a chemisorption analyzer (ChemiSorb 2750). Optical properties were evaluated by DRS using a UV–Vis–NIR spectrophotometer (Lambda 950). The chemical states of surface elements were analyzed by XPS (AXIS Supra+). TRMC measurements were conducted with the third harmonic of a Nd:YAG laser (Vibrant II, Opotek) for photoexcitation. PL spectra were produced from a fluorophotometer (Shimadzu, RF-5301PC).

### Photocatalytic H<sub>2</sub>O<sub>2</sub> production

For each experiment, 10 mg of photocatalyst powder was dispersed in 20 mL of deionized water (pH ~8) and subjected to ultrasonic treatment for 30 min to ensure complete dispersion. The suspension was then purged with O<sub>2</sub> in the dark for 1 h to achieve oxygen saturation. Photocatalytic reactions were initiated under continuous magnetic stirring by irradiating the suspension with a 90 W LED lamp emitting visible light ( $\lambda > 390$  nm). During the reaction, air or O<sub>2</sub> was continuously supplied at a flow rate of 20 mL min<sup>-1</sup>, and the temperature was maintained at 25 °C using a circulating water bath. The average light intensity was approximately 420 W m<sup>-2</sup>. At determined intervals, 1 mL aliquots were withdrawn from the reaction mixture for quantifying the reaction product.

### Determination of H<sub>2</sub>O<sub>2</sub> concentration

The concentration of hydrogen peroxide produced during the photocatalytic reaction was determined using an iodometric spectrophotometric method.<sup>1</sup> In a typical analysis, 1.0 mL of the reaction supernatant was collected and mixed with 0.5 mL of 0.4 mol L<sup>-1</sup> potassium iodide (KI) solution and 0.5 mL of 0.1 mol L<sup>-1</sup> potassium hydrogen phthalate (C<sub>8</sub>H<sub>5</sub>KO<sub>4</sub>) solution. Potassium

hydrogen phthalate provides a weakly acidic environment that facilitates the oxidation of iodide by hydrogen peroxide. The mixture was allowed to react in the dark for 30 min to ensure complete reaction. Under acidic conditions, hydrogen peroxide oxidizes iodide ions ( $I^-$ ) to iodine ( $I_2$ ), which subsequently reacts with excess iodide ions to form the triiodide ion ( $I_3^-$ ). The reactions involved are expressed as:

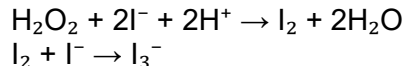

The generated triiodide ion exhibits a characteristic absorption band at approximately 350 nm. The absorbance of the solution was measured using a UV-Vis spectrophotometer, and the concentration of  $H_2O_2$  was determined from a calibration curve prepared using standard hydrogen peroxide solutions under identical conditions. All measurements were conducted at least three times to ensure reproducibility, and the average values were reported.

### Determination of apparent quantum yield (AQY)

To determine the AQY value, photocatalytic reactions were carried out with 20 mg of photocatalyst powder dispersed in 20 mL of deionized water using a 300 W Xenon lamp equipped with a narrow bandpass filter to provide monochromatic illumination. The AQY was calculated using the following equation.

$$AQY (\%) = \left( \frac{2\nu N_A h c}{I A \lambda} \right) \times 100$$

Where:

- $\nu$  is the rate of BAL production ( $\text{mol s}^{-1}$ )
- $N_A$  is the Avogadro's number ( $6.02 \times 10^{23} \text{ mol}^{-1}$ )
- $h$  is Planck's constant ( $6.62 \times 10^{-34} \text{ J s}$ )
- $c$  is the speed of light ( $3.0 \times 10^8 \text{ m s}^{-1}$ )
- $I$  is the light irradiance ( $760 \text{ W m}^{-2}$ )
- $A$  is the irradiation area ( $2.83 \times 10^{-5} \text{ m}^2$ )
- $\lambda$  is the light wavelength (360, 420, 450, 550, or 600 nm)

### Determination of solar-to-chemical conversion (SCC) efficiency

To determine the SCC efficiency, photocatalytic reactions were performed with 50 mg of photocatalyst powder dispersed in 50 mL of deionized water using a 300 W Xenon lamp equipped with an AM 1.5G filter, delivering an incident light intensity of  $1000 \text{ W m}^{-2}$  (1 sun). The SCC was calculated using the following equation.

$$SCC (\%) = \frac{n \times \Delta G}{I \times A \times t} \times 100$$

Where:

- $n$  is moles of  $H_2O_2$  formed (mol)
- $\Delta G$  is Gibbs free energy change for  $H_2O_2$  formation ( $117 \text{ kJ mol}^{-1}$ )
- $I$  is the light irradiance ( $1000 \text{ W m}^{-2}$ )
- $A$  is the irradiation area ( $2.83 \times 10^{-5} \text{ m}^2$ )
- $t$  is irradiation time (s)

### DFT calculation

All calculations were performed using ORCA version 6.1.1 with SHARK integral generation and digestion system.<sup>2, 3</sup> Initial molecular geometries were optimized using the Becke–Perdew 1986 (BP86) exchange–correlation functional in combination with the split-valence (SV) basis set, employing slow self-consistent field (SlowConv) convergence. Final geometry optimizations were carried out using the Becke, three-parameter, Lee–Yang–Parr (B3LYP) hybrid exchange–correlation functional together with the triple-zeta valence plus polarization (TZVP) basis set, employing no resolution-of-identity approximation (NoRI) and tight self-consistent field convergence criteria (TightSCF) to improve convergence reliability. All optimized structures correspond to fully converged minima at the B3LYP/TZVP level. Molecular structures were visualized using the program Chemcraft (version 1.8, build 682).

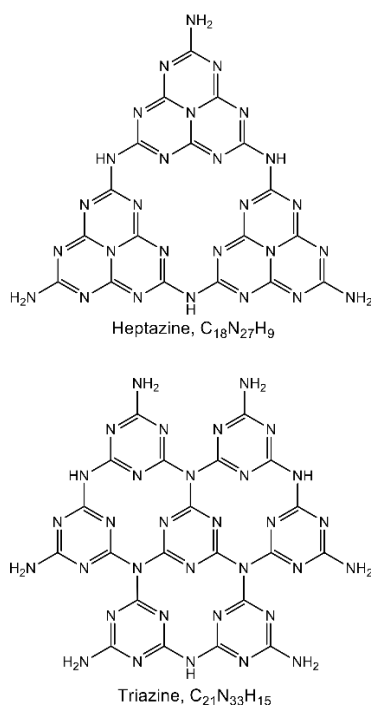

**Figure S1.** Molecular unit structures of heptazine and triazine in graphitic  $C_3N_4$ .

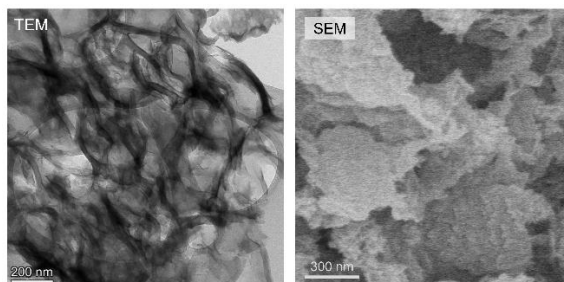

**Figure S2.** Electron micrographs of the heptazine sample.

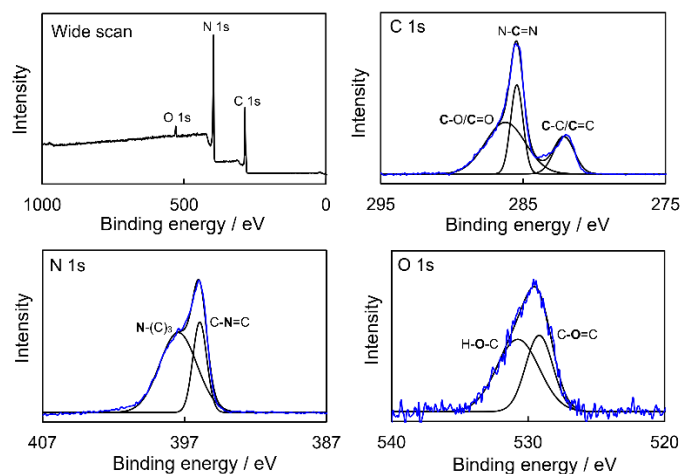

**Figure S3.** XPS spectra of the heptazine sample.

**Table S1.** Performance comparison of defective g-CN for photocatalytic H<sub>2</sub>O<sub>2</sub> in pure water.

| Catalyst                 | Notes                                                                                                       | Light source               | Catalyst weight / mg | H <sub>2</sub> O <sub>2</sub> evolution rate / $\mu\text{M h}^{-1}$ | Ref.         |
|--------------------------|-------------------------------------------------------------------------------------------------------------|----------------------------|----------------------|---------------------------------------------------------------------|--------------|
| C <sub>v</sub> -CN       | C defects                                                                                                   | $\lambda > 420 \text{ nm}$ | 100                  | 96                                                                  | 4            |
| PuCN                     | Porous ultrathin; N defects                                                                                 | $\lambda > 420 \text{ nm}$ | 30                   | 41                                                                  | 1            |
| N <sub>v</sub> -CN       | N defects                                                                                                   | $\lambda > 420 \text{ nm}$ | 50                   | 76                                                                  | 5            |
| R <sub>370</sub> -CN     | The reduction product of g-C <sub>3</sub> N <sub>4</sub> -450 at 370 °C using NaBH <sub>4</sub> , N defects | $\lambda > 420 \text{ nm}$ | 100                  | 170                                                                 | 6            |
| B <sub>3</sub> CN        | Calcination at a mass ratio of NaBH <sub>4</sub> to CN of 3; N defects and $-\text{C}\equiv\text{N}$        | $\lambda > 420 \text{ nm}$ | 10                   | 114                                                                 | 7            |
| V <sub>s</sub> -CN       | N defects and $-\text{C}\equiv\text{N}$                                                                     | $\lambda > 420 \text{ nm}$ | 30                   | 85                                                                  | 8            |
| U-CN                     | Ultra-thin CN prepared by exfoliation                                                                       | $\lambda > 400 \text{ nm}$ | 30                   | 73                                                                  | 9            |
| C <sub>v</sub> -CN       | C defects                                                                                                   | $\lambda > 390 \text{ nm}$ | 10                   | 115                                                                 | Present work |
| Anatase TiO <sub>2</sub> | Commercial sample                                                                                           | $\lambda > 390 \text{ nm}$ | 10                   | 4                                                                   | Present work |
| Rutile TiO <sub>2</sub>  | Commercial sample                                                                                           | $\lambda > 390 \text{ nm}$ | 10                   | Not detected                                                        | Present work |

## References

1. X. Zhang, H. Su, P. Cui, Y. Cao, Z. Teng, Q. Zhang, Y. Wang, Y. Feng, R. Feng and J. Hou, *Nature Communications*, 2023, **14**, 7115.
2. F. Neese, *Wiley Interdisciplinary Reviews: Computational Molecular Science*, 2025, **15**, e70019.
3. F. Neese, *Journal of Computational Chemistry*, 2023, **44**, 381-396.
4. S. Li, G. Dong, R. Hailili, L. Yang, Y. Li, F. Wang, Y. Zeng and C. Wang, *Applied Catalysis B: Environmental*, 2016, **190**, 26-35.

5. Y. Lu, Y. Guo, S. Zhang, L. Li, R. Jiang, D. Zhang, J. C. Yu and J. Wang, *ACS nano*, 2024, **18**, 20435-20448.
6. Z. Zhu, H. Pan, M. Murugananthan, J. Gong and Y. Zhang, *Applied Catalysis B: Environmental*, 2018, **232**, 19-25.
7. B. Sheng, J. Li and J. Zhang, *Applied Catalysis A: General*, 2025, **701**, 120311.
8. W. Zeng, Y. Dong, X. Ye, Y. Zhao, Z. Zhang, T. Zhang, L. Zhang, J. Chen and X. Guan, *ACS Catalysis*, 2025, **15**, 6036-6045.
9. Y. Peng, H. Wang, R. Li, N. Teng, L. Ding, H. Wu, T. Sakurai, S. Liang, Y. Shimoyama and K. Sato, *Journal of Materials Chemistry A*, 2025, **13**, 37883-37896.
